# Supplementary material for: Polypyrrole–MXene coated textile-based flexible energy storage device
Source: Royal Society of Chemistry journal article supplement (doi:10.1039/c8ra08403c), 2018-01-01
Supplement: c8ra08403c1.pdf [file c8ra08403c1.pdf]

## Polypyrrole–MXene Coated Textile-Based Flexible Energy Storage Device

Jinfeng Yan, Yanan Ma\*, Chuankun Zhang, Weizhi Liu, Xinyu Yao, Shuai Yao,  
Shijun Luo

School of Sciences, Hubei University of Automotive Technology, Shiyan 442002, P.R. China

\*Corresponding author. E-mail: [mayn@huat.edu.cn](mailto:mayn@huat.edu.cn)

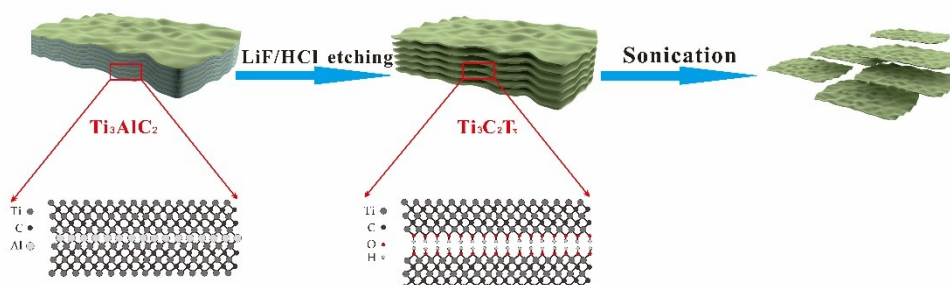

Figure S1

S1. Schematic of the synthesis route to  $\text{Ti}_3\text{C}_2\text{T}_x$  MXene nanosheets.

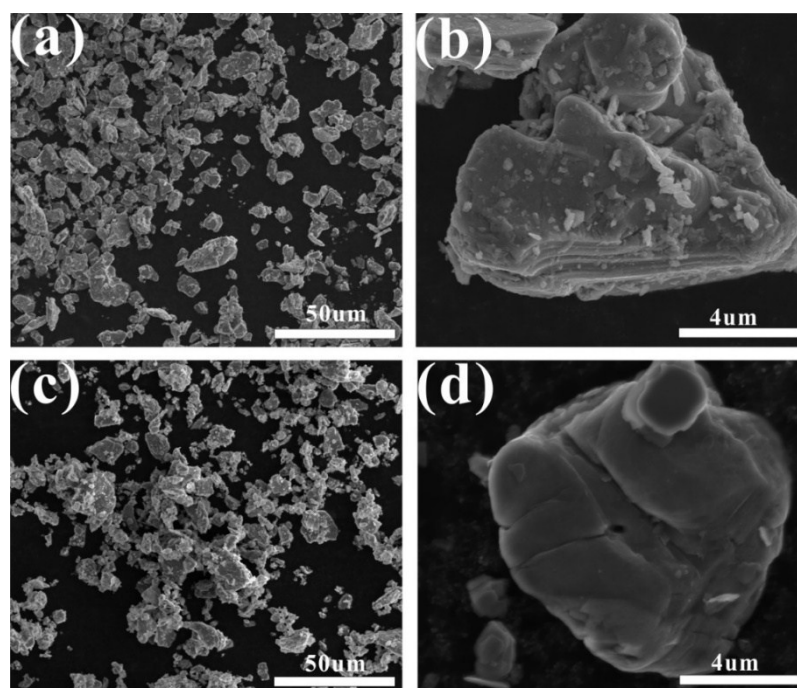

Figure S2. The typical SEM images of  $\text{Ti}_3\text{AlC}_2$  MAX phase.

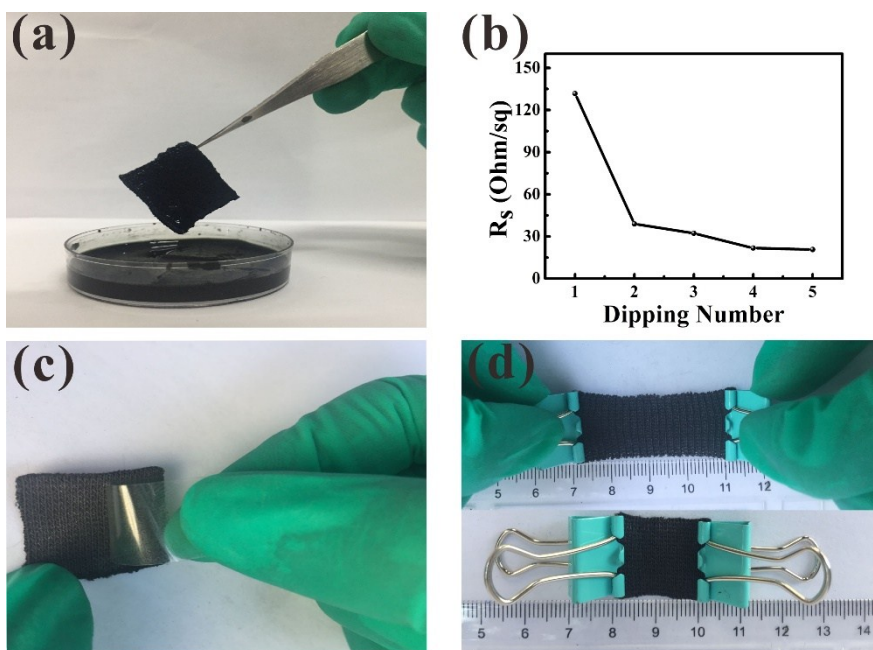

**Figure S3. (a) The optical image of MXene-based fabric. (b) The curve shows the relation of square resistance versus soaking times. (c) MXene nanosheets tightly coated on the surface of fabric. (d) The MXene-based fabric electrode displays good stretchable property.**

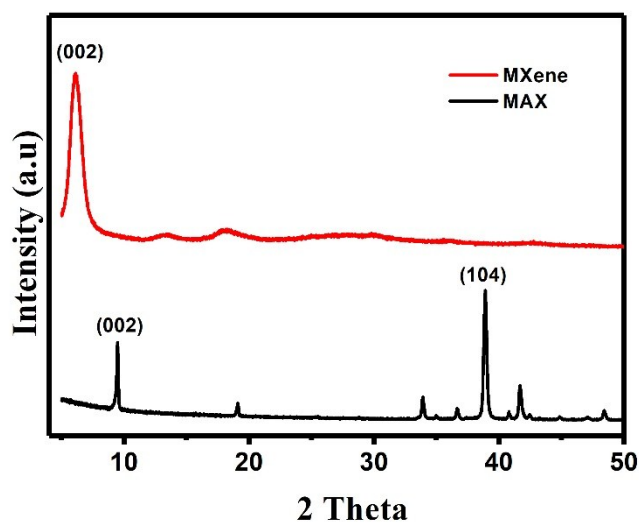

**Figure S4. XRD patterns of the MAX and MXene. It is shown that (002) peak at  $\sim 9^\circ$  related to MAX phase shifted towards lower angles ( $\sim 6^\circ$ ) and the (104) at  $\sim 39^\circ$  peak disappeared, confirming successful etching away of Al layers and forming MXene.**

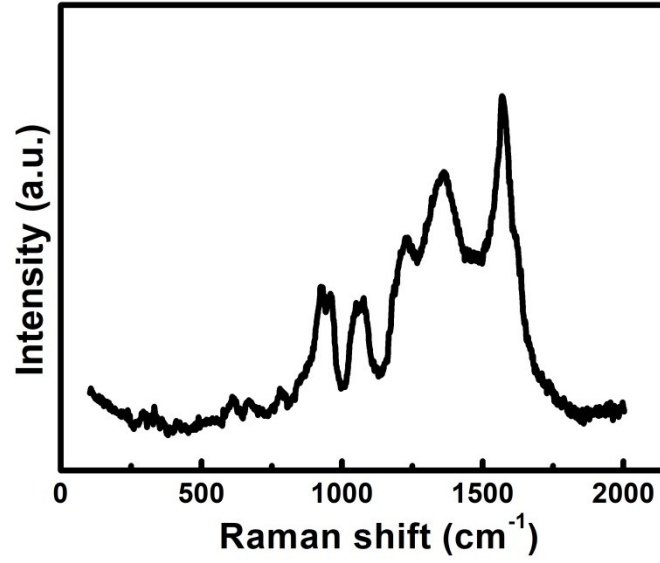

Figure S5. The Raman spectrum of PPy.

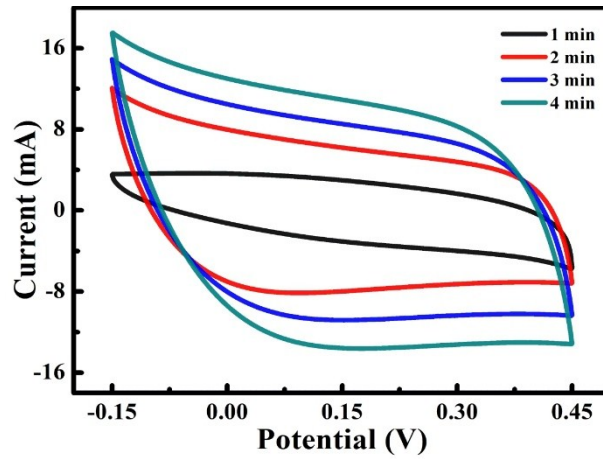

Figure S6. The CV curves of PPy-MXene coated fabric electrode with different plating time.

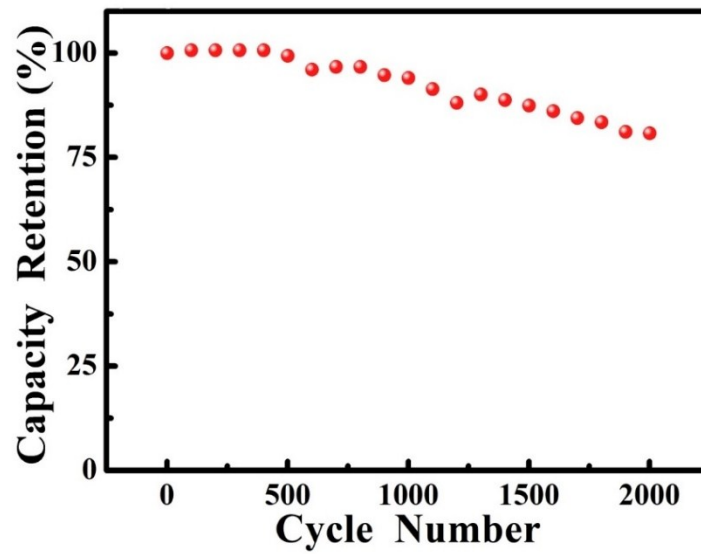

Figure S7. The cyclic performances of symmetrical solid-state supercapacitor based on MXene-PPy textile.

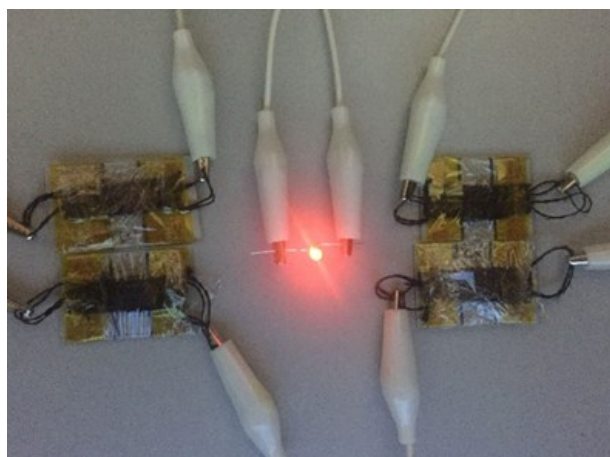

**Figure S8. The photograph of the MXene-based textile supercapacitor in series can lighten the LED bulb.**
